# Supplementary material
Source: publisher figshare collection journal article supplement (https://karger.figshare.com/ndownloader/files/37421917)
Supplement: Supplementary file 1 [file 37421917]

## Sheet: Sheet1
Supplementary Table1. Multiple linear regression analysis examining the interactions of genotypes of seven core circadian clock genes with physical activity for determining of glucose and LDL-C levels.
		Glucose				LDL-C
R2		0.097				0.1
intercept		70.5				83.6
Determinant variables		β-coefficient	SE	P-value		β-coefficient	SE	P-value
Age		0.058	0.11	0.61		-0.23	0.23	0.32
BMI		1.14	0.23	<0.0001		2.42	0.47	<0.0001
Physical activity		2.23	1.39	0.11		-2.1	2.78	0.45
PER1 genotype		1.76	0.93	0.058		-2.08	1.86	0.26
PER2 genotype		-0.24	1.01	0.82		1.02	2.02	0.62
PER3 genotype		-2.44	0.96	0.011		1.77	1.92	0.36
CRY1 genotype		0.47	0.69	0.49		-4.05	1.39	0.0037
CRY2 genotype		0.89	0.69	0.2		1.11	1.38	0.42
CLOCK genotype		0.3	0.71	0.67		1.32	1.43	0.36
BMAL1 genotype		0.37	0.92	0.68		2.07	1.86	0.26
PER1 genotype X Physical activity		-0.0072	0.93	0.99		-2.05	1.87	0.28
PER2 genotype X Physical activity		0.14	1.01	0.89		0.52	2.02	0.8
PER3 genotype X Physical activity		-1.24	0.96	0.2		0.65	1.92	0.74
CRY1 genotype X Physical activity		1.33	0.69	0.055		-1.34	1.39	0.34
CRY2 genotype X Physical activity		0.07	0.69	0.92		0.68	1.38	0.62
CLOCK genotype X Physical activity		1.1	0.71	0.13		1.54	1.43	0.28
BMAL1 genotype X Physical activity		0.13	0.92	0.89		0.48	1.86	0.8
β-coefficient, standardized coefficient; SE, standard error of coefficient
